# Supplementary material
Source: Springer Nature journal article supplement (https://www.springermedizin.de/resource/supplementary/12985_2013_2255_MOESM1_ESM.pdf/9606342)

**A**

control

+CD

+Jaspla

actin

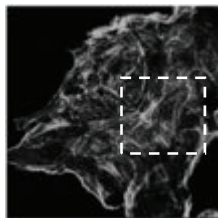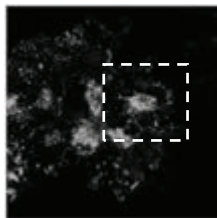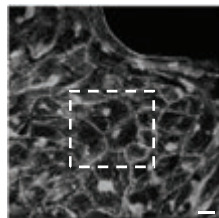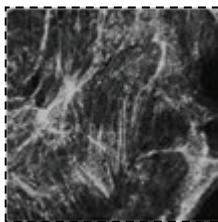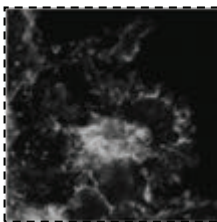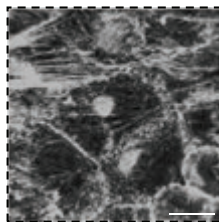**B**

control

+CD

+Jaspla

microtubules

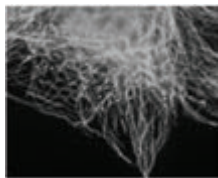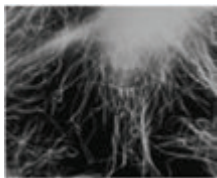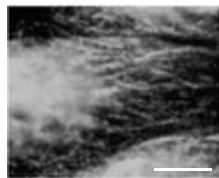

Supplement: MOESM1 [file 9606342]
